# Supplementary material for: Zero-bias Bi-based perovskite image sensor arrays with direct laser-scribing process
Source: Royal Society of Chemistry journal article supplement (doi:10.1039/d3tc02180g), 2023-01-01
Supplement: d3tc02180g1.pdf [file d3tc02180g1.pdf]

## Electronic Supplementary Information

### **Zero-bias Bi-based perovskite image sensor arrays with direct laser-scribing process**

Yaqian Yang,<sup>a</sup> Ying Li,<sup>\*b</sup> Di Chen,<sup>a,b</sup> and Guozhen Shen<sup>\*b</sup>

<sup>a</sup>School of Mathematics and Physics, University of Science and Technology Beijing,  
Beijing 100083, China

<sup>b</sup>School of Integrated Circuits and Electronics, Beijing Institute of Technology, Beijing  
100081, China

E-mail: liying0326@bit.edu.cn, gzshen@bit.edu.cn

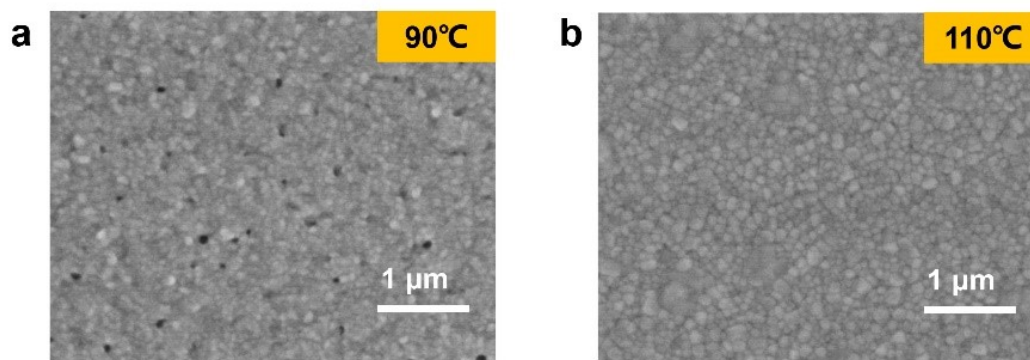

**Figure S1.** Top-view SEM image of Cs<sub>3</sub>Bi<sub>2</sub>Br<sub>9</sub> with annealing temperatures of (a) 90°C and (b) 110°C.

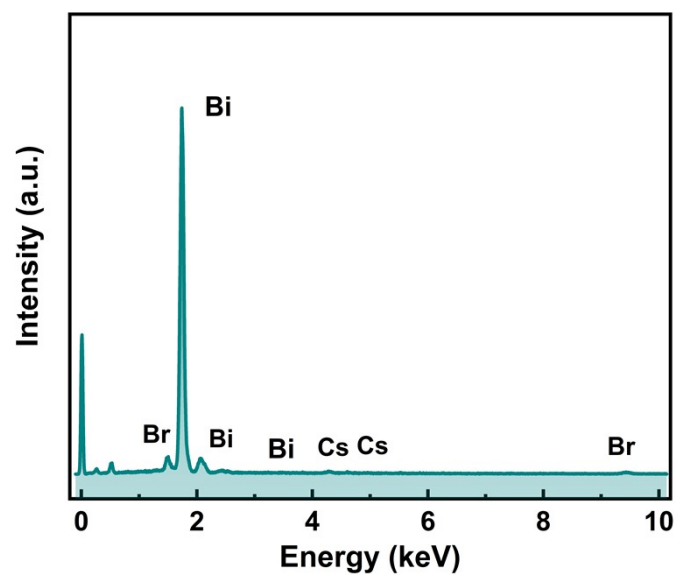

**Figure S2.** EDS spectra of the  $\text{Cs}_3\text{Bi}_2\text{Br}_9$  films.

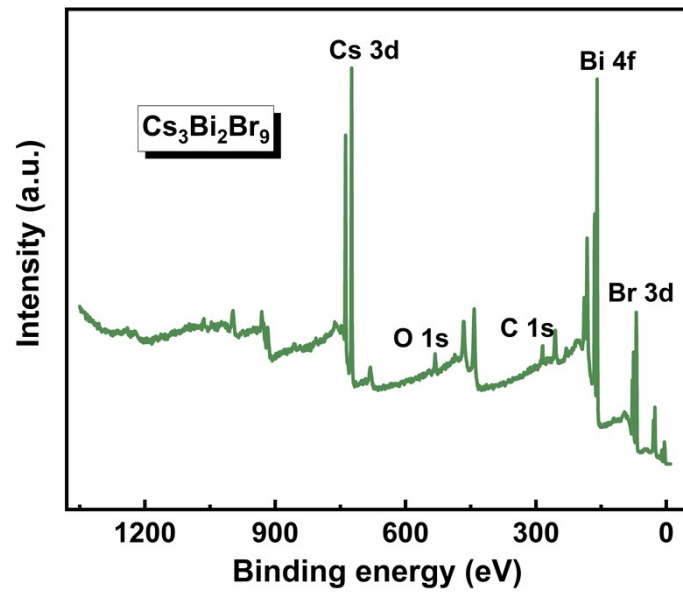

**Figure S3.** XPS spectra of the  $\text{Cs}_3\text{Bi}_2\text{Br}_9$  films.

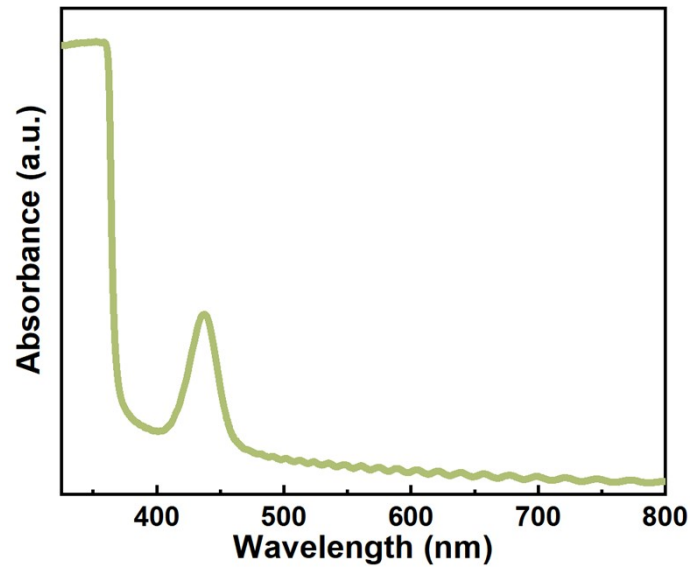

**Figure S4.** Absorption spectrum of the Cs<sub>3</sub>Bi<sub>2</sub>Br<sub>9</sub>/GaN films.

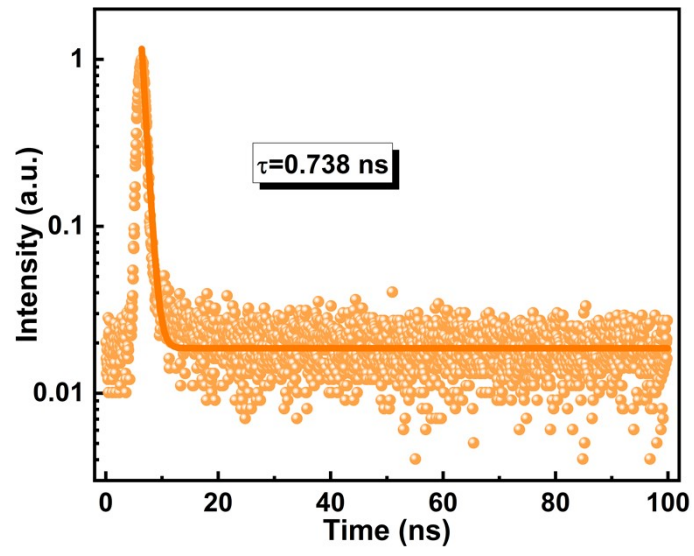

**Figure S5.** The time-resolved PL decay and fitting curve of Cs<sub>3</sub>Bi<sub>2</sub>Br<sub>9</sub>.

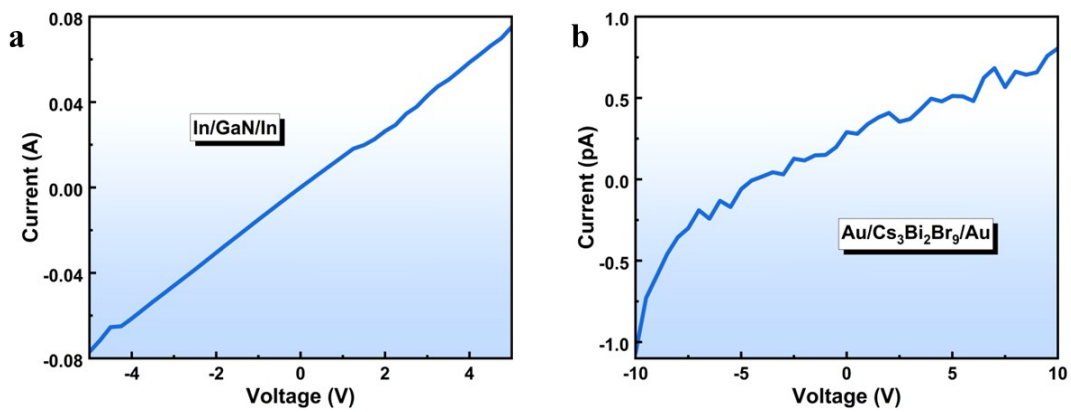

**Figure S6.** (a) *I*-*V* characteristics of In electrodes on GaN. (b) *I*-*V* characteristics of Au electrodes on Cs<sub>3</sub>Bi<sub>2</sub>Br<sub>9</sub>.

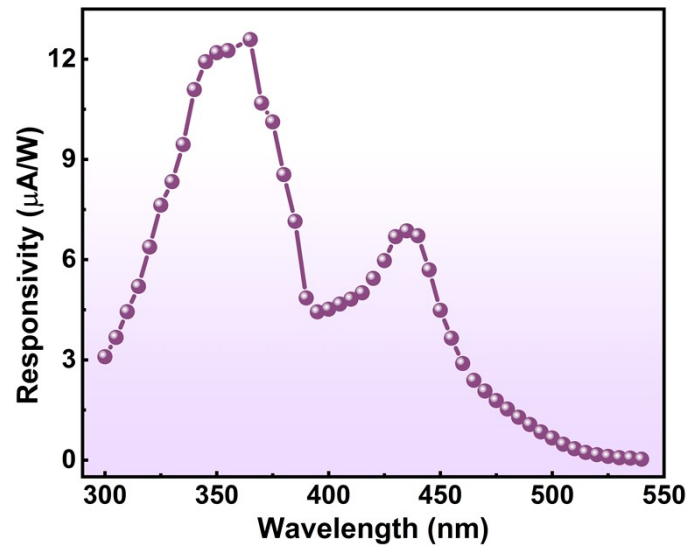

**Figure S7.** Spectral response of the device.



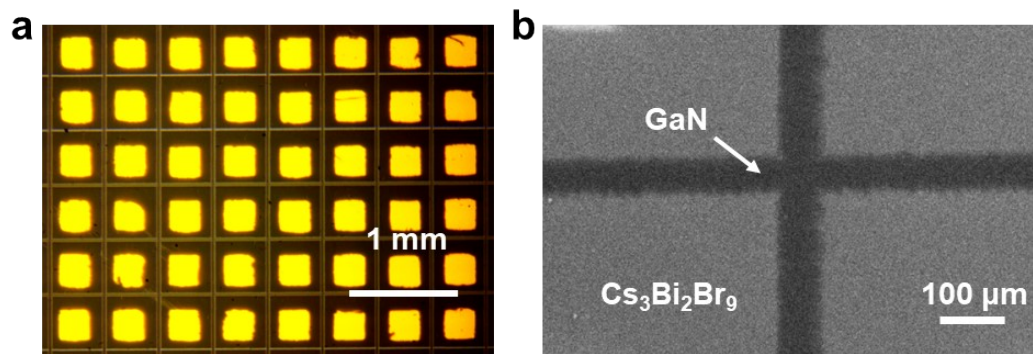

**Figure S8.** (a) Optical and (b) SEM image of PDs arrays.

Table S1 Summary of the performance of heterojunction PDs

| Device                                                              | $P_{\min}$<br>(mW cm <sup>-2</sup> )    | $\lambda$<br>(nm) | Bias<br>(V) | R<br>(A/W)     | $D^*$<br>(Jones)                        | $\tau_r/\tau_d$<br>(s) | Ref              |
|---------------------------------------------------------------------|-----------------------------------------|-------------------|-------------|----------------|-----------------------------------------|------------------------|------------------|
| <b>GaN/Cs<sub>3</sub>Bi<sub>2</sub>Br<sub>9</sub></b>               | <b><math>1.34 \times 10^{-5}</math></b> | <b>405</b>        | <b>0</b>    | <b>24.87 m</b> | <b><math>3.02 \times 10^{11}</math></b> | <b>17.4/17.6 m</b>     | <b>This work</b> |
| GaN/CsPbBr <sub>3</sub>                                             | —                                       | 310               | 0           | 1.08 m         | —                                       | 0.74/7.20              | [1]              |
| CuI/CsCu <sub>2</sub> I <sub>3</sub> /GaN                           | 0.01                                    | 365               | 0           | 71.7 m         | $3.3 \times 10^{12}$                    | 8.8/0.32               | [2]              |
| TiO <sub>2</sub> /Cs <sub>2</sub> AgBiBr <sub>6</sub> /Cu<br>SCN    | $5 \times 10^{-6}$                      | 405               | 0           | 0.34m          | $1.03 \times 10^{13}$                   | —                      | [3]              |
| (BA) <sub>2</sub> FAPb <sub>2</sub> I <sub>7</sub> :FACl/<br>C8BTBT | $0.25 \times 10^{-3}$                   | 405               | 2           | 2.3            | $3.2 \times 10^{12}$                    | 9.74/8.91 $\mu$        | [4]              |
| FAPb <sub>0.5</sub> Sn <sub>0.5</sub> I <sub>3</sub> /SnS<br>QDs    | —                                       | 850               | 0           | 0.522          | $2.57 \times 10^{12}$                   | 0.029/0.012            | [5]              |
| MAPbI <sub>3</sub> /Cs <sub>2</sub> AgBiBr <sub>6</sub>             | —                                       | 622               | -20         | 16.8 m         | $1.33 \times 10^{11}$                   | 70.3/68.6 m            | [6]              |
| MAPbI <sub>3</sub> /Si                                              | 0.05                                    | 970               | -2          | 18.4 m         | $1.8 \times 10^{12}$                    | —                      | [7]              |
| ZnO/MAPbBr <sub>3</sub> -<br>PMMA/PTAA                              | 244 pW                                  | 442               | 0           | 0.34           | $1.24 \times 10^{13}$                   | 0.18/0.22              | [8]              |

## Reference

- 1 J. Zhang, B. Jiao, J. Dai, D. Wu, Z. Wu, L. Bian, Y. Zhao, W. Yang, M. Jiang, S. Lu, *Nano Energy*, 2022, **100**, 107437.
- 2 X. Zhou, C. Wang, J. Luo, L. Zhang, F. Zhao, Q. Ke, *Chem. Eng. J.*, 2022, **450**, 136364.
- 3 G. Yan, Z. Ji, Z. Li, B. Jiang, M. Kuang, X. Cai, Y. Yuan, W. Mai, *Sci. China Mater.*, 2020, **64**, 198.
- 4 T. Wang, D. Zheng, J. Zhang, J. Qiao, C. Min, X. Yuan, M. Somekh, F. Feng, *Adv. Funct. Mater.*, 2022, **32**, 2208694.
- 5 Z. Liu, Z. Zhang, X. Zhang, X. Li, Z. Liu, G. Liao, Y. Shen, M. Wang, *Nano Lett.*, 2023, **23**, 1181.
- 6 M. Wang, Y. Xu, X. Wang, Y. Li, J. Zhao, Y. Pan, J. Chen, Q. Li, Z. Zhao, J. Wu, W. Lei, *APL Mater.*, 2022, **10**, 041101.
- 7 Z. Zhang, C. Xu, C. Zhu, X. Tong, C. Fu, J. Wang, Y. Cheng, L. Luo, *Sens. Actuator A: Phys.*, 2021, **332**, 113176.
- 8 J. Zeng, C. Meng, X. Li, Y. Wu, S. Liu, H. Zhou, H. Wang, H. Zeng, *Adv. Funct. Mater.*, 2019, **29**, 1904461.
